# Supplementary material for: Contact Sports as a Risk Factor for Amyotrophic Lateral Sclerosis: A Systematic Review
Source: PubMed Central journal article supplement — Global Spine J. 2019 Jan 31;9(1):104–18. doi: 10.1177/2192568218813916 (PMC6362556; doi:10.1177/2192568218813916), 2019-01-31
Supplement: Supplemental_digital_material.pdf [file Supplemental_digital_material.pdf]

## **Methods**

### **Search Terms**

("Motor Neuron Disease"[Mesh] OR "Amyotrophic Lateral Sclerosis"[Mesh] OR "Motor Neuron Disease" OR "Lateral Sclerosis" OR "Lateral Scleroses" OR "Anterior Horn Cell Disease" OR "Charcot Disease" OR "Amyotrophic Lateral Sclerosis" OR ALS OR "Gehrig's Disease" OR "Gehrig Disease" OR "Gehrigs Disease" OR "Guam Disease") AND (FOOTBALL[TIAB] OR SPORT[TIAB] OR SPORTS[TIAB] OR SOCCER[TIAB] OR BOXING[TIAB] OR HOCKEY[TIAB])

### **Inclusion and exclusion criteria table**

|                        | <b>Include</b>                                                                                                                     | <b>Exclude</b>                                                                                                                                             |
|------------------------|------------------------------------------------------------------------------------------------------------------------------------|------------------------------------------------------------------------------------------------------------------------------------------------------------|
| <b>Population</b>      | <ul style="list-style-type: none"><li>• Adults (<math>\geq 16</math> years) with a history of playing competitive sports</li></ul> | <ul style="list-style-type: none"><li>• Youth sports under the age of 16 years</li></ul>                                                                   |
| <b>Exposure</b>        | <ul style="list-style-type: none"><li>• Level of competitive play (professional, non-professional)</li><li>• Sport type</li></ul>  | <ul style="list-style-type: none"><li>• Strenuous non-competitive sport activity</li><li>• Military</li><li>• Non-sport trauma</li></ul>                   |
| <b>Comparator</b>      | <ul style="list-style-type: none"><li>• Non-sport control</li><li>• Standardized reference group</li></ul>                         | <ul style="list-style-type: none"><li>• Crude (non-standardized) population reference group</li></ul>                                                      |
| <b>Outcome</b>         | <ul style="list-style-type: none"><li>• ALS</li><li>• Mortality associated with ALS</li></ul>                                      | <ul style="list-style-type: none"><li>• Other neurologic disorders</li></ul>                                                                               |
| <b>Type of studies</b> | <ul style="list-style-type: none"><li>• Cohort study</li><li>• Case control study</li></ul>                                        | <ul style="list-style-type: none"><li>• Cross-sectional studies</li><li>• Studies not producing an effect measure (OR, RR or standardized ratio)</li></ul> |

### **Definitions of professional and non-professional sports.**

Non-professional sports included sports that were labelled organized or competitive. Professional sports were all identified as professional, employed professionally, employed for  $\geq 1$  year as main occupation, or identified with a professional organization such as the A, B and C soccer league in Italy or the National Football League in America.

### **Excluded at Full Text**

|                                                                                                                                                                                                                                              | <b>Reason for exclusion</b>            |
|----------------------------------------------------------------------------------------------------------------------------------------------------------------------------------------------------------------------------------------------|----------------------------------------|
| 1. Cruz DC1, Nelson LM, McGuire V, Longstreth WT Jr. Physical trauma and family history of neurodegenerative diseases in amyotrophic lateral sclerosis: a population-based case-control study. <i>Neuroepidemiology</i> . 1999;18(2):101-10. | No sport specific data                 |
| 2. Deapen DM, Henderson BE. A case-control study of amyotrophic lateral sclerosis. <i>Am J Epidemiol</i> . 1986 May;123(5):790-9.                                                                                                            | No sport specific data                 |
| 3. Gallo V1,2, et al. Physical activity and risk of Amyotrophic Lateral Sclerosis in a prospective cohort study. <i>Eur J Epidemiol</i> . 2016 Mar;31(3):255-66. doi: 10.1007/s10654-016-0119-9. Epub 2016 Mar 11.                           | No sport specific data                 |
| 4. Abel EL. Football increases the risk for Lou Gehrig's disease, amyotrophic lateral sclerosis. <i>Percept Mot Skills</i> 2007;104(3 Pt 2):1251-1254                                                                                        | Crude prevalence, no standardized rate |
| 5. Kondo K, Tsubaki T. Case-control studies of motor neuron disease: association with mechanical injuries. <i>Arch Neurol</i> . 1981 Apr;38(4):220-6.                                                                                        | No sport specific data                 |

|     |                                                                                                                                                                                                                                                                                                                       |                               |
|-----|-----------------------------------------------------------------------------------------------------------------------------------------------------------------------------------------------------------------------------------------------------------------------------------------------------------------------|-------------------------------|
| 6.  | Li TM, Alberman E, Swash M. Clinical features and associations of 560 cases of motor neuron disease. <i>J Neurol Neurosurg Psychiatry</i> . 1990 Dec;53(12):1043-5.                                                                                                                                                   | Case series, no controls      |
| 7.  | Pupillo E1, Messina P, Logroscino G, Zoccolella S, Chiò A, Calvo A, Corbo M, Lunetta C, Micheli A, Millul A, Vitelli E, Beghi E; EURALS Consortium. Trauma and amyotrophic lateral sclerosis: a case-control study from a population-based registry. <i>Eur J Neurol</i> . 2012 Dec;19(12):1509-17. Epub 2012 Apr 27. | No sport specific data        |
| 8.  | Armon C, Kurland LT, Daube JR, O'Brien PC. Epidemiologic correlates of sporadic amyotrophic lateral sclerosis. <i>Neurology</i> 1991;41(7):1077-1084                                                                                                                                                                  | No sport specific data        |
| 9.  | Feddermann-Demont N, Junge A, Weber KP, Weller M, Dvorak J, Tarnutzer AA. Prevalence of potential sports-associated risk factors in Swiss amyotrophic lateral sclerosis patients. <i>Brain Behav</i> 2017;7(4):e00630                                                                                                 | No sport specific data        |
| 10. | Gunnarsson LG, Bodin L, Soderfeldt B, Axelson O. A case-control study of motor neurone disease: its relation to heritability, and occupational exposures, particularly to solvents. <i>Br J Ind Med</i> 1992;49(11):791-798                                                                                           | No sport specific data        |
| 11. | Park RM, Schulte PA, Bowman JD, et al. Potential occupational risks for neurodegenerative diseases. <i>Am J Ind Med</i> 2005;48(1):63-77                                                                                                                                                                              | No sport specific data        |
| 12. | Williams DB, Annegers JF, Kokmen E, O'Brien PC, Kurland LT. Brain injury and neurologic sequelae: a cohort study of dementia, parkinsonism, and amyotrophic lateral sclerosis. <i>Neurology</i> 1991;41(10):1554-1557                                                                                                 | No sport specific data        |
| 13. | Schulte PA, Burnett CA, Boeniger MF, Johnson J. Neurodegenerative diseases: occupational occurrence and potential risk factors, 1982 through 1991. <i>Am J Public Health</i> 1996;86(9):1281-1288                                                                                                                     | Not ALS specific              |
| 14. | Okamoto K, Kihira T, Kondo T, et al. Lifestyle factors and risk of amyotrophic lateral sclerosis: a case-control study in Japan. <i>Ann Epidemiol</i> 2009;19(6):359-364                                                                                                                                              | No sport specific data        |
| 15. | Kurtzke JF, Beebe GW. Epidemiology of amyotrophic lateral sclerosis: 1. A case-control comparison based on ALS deaths. <i>Neurology</i> 1980;30(5):453-462                                                                                                                                                            | No sport specific data        |
| 16. | Gallagher JP, Sanders M. Trauma and amyotrophic lateral sclerosis: a report of 78 patients. <i>Acta Neurol Scand</i> 1987;75(2):145-150                                                                                                                                                                               | No sport specific data        |
| 17. | Provinciali L, Giovagnoli AR. Antecedent events in amyotrophic lateral sclerosis: do they influence clinical onset and progression? <i>Neuroepidemiology</i> 1990;9(5):255-262                                                                                                                                        | No sport specific data        |
| 18. | Savettieri G, Salemi G, Arcara A, Cassata M, Castiglione MG, Fierro B. A case-control study of amyotrophic lateral sclerosis. <i>Neuroepidemiology</i> 1991;10(5-6):242-245                                                                                                                                           | No sport specific data        |
| 19. | Gotkine M, Friedlander Y, Hochner H. Triathletes are over-represented in a population of patients with ALS. <i>Amyotroph Lateral Scler Frontotemporal Degener</i> 2014;15(7-8):534-536                                                                                                                                | Wrong design, cross-sectional |

## Risk of Bias Evaluation

| COHORT STUDIES |                                                            |                         |                              |                              |                                   |            |     |                                                                                                                                        |
|----------------|------------------------------------------------------------|-------------------------|------------------------------|------------------------------|-----------------------------------|------------|-----|----------------------------------------------------------------------------------------------------------------------------------------|
| Study          | Participants in both cohorts came from the same population | Complete follow-up ≥80% | F/U long enough for outcomes | Objective, unbiased outcomes | Accounting for prognostic factors | RoB Rating | CoE | Comments/questions                                                                                                                     |
| Chio 2009      | No*                                                        | Yes                     | Yes                          | Yes                          | Yes†                              | Mod high   | III | *Cases from players born in Italy, controls from registries covering 15% of pop †SMRs matching on age and sex                          |
| Janssen 2017   | Yes                                                        | No*                     | Yes                          | Yes                          | No                                | High       | IV  | *Only athletes with constant prolonged medical presence in Rochester Epidemiology Project database were included (30% of all athletes) |
| Savica 2012    | Yes                                                        | No*                     | Yes                          | Yes                          | No                                | High       | IV  | *Differential f/u 86% vs 69%)                                                                                                          |
| Lehman 2012    | Yes                                                        | Yes                     | Yes                          | Yes                          | Yes†                              | Mod low    | II  | *Unclear how many players were originally included in the study †SMR matching on race, age and calendar year                           |
| Taioli 2007    | Yes                                                        | Yes                     | Yes                          | Yes                          | Yes*                              | Mod low    | II  | *SMR matching on sex, age, calendar year                                                                                               |
| Belli 2005     | Yes                                                        | Yes                     | Yes                          | Yes                          | Yes*                              | Mod low    | II  | *PMR matching on sex, age, calendar year                                                                                               |

| CASE-CONTROL STUDIES |                                                             |                                                     |                           |                                   |            |     |                                                                                                |
|----------------------|-------------------------------------------------------------|-----------------------------------------------------|---------------------------|-----------------------------------|------------|-----|------------------------------------------------------------------------------------------------|
| Study                | Incidence cases from defined population over specified time | Control represents population from which cases come | Exposure precedes outcome | Accounting for prognostic factors | RoB Rating | CoE | Comments/questions                                                                             |
| Beghi 2010           | Unclear*                                                    | Yes                                                 | Yes                       | Yes                               | Mod high   | III | *No specified time for population                                                              |
| Huisman 2013         | Yes                                                         | Yes                                                 | Yes                       | Yes                               | Mod high   | III |                                                                                                |
| Longstreth 1998      | Yes                                                         | Yes                                                 | Yes                       | Yes                               | Mod high   | III |                                                                                                |
| Pupillo 2014         | Yes                                                         | Yes                                                 | Yes                       | Yes                               | Mod high   | III |                                                                                                |
| Strickland 1996      | Unclear*                                                    | Yes                                                 | Yes                       | Yes                               | Mod high   | III | *No specified time for population                                                              |
| Valenti 2005         | Yes                                                         | Yes                                                 | Yes                       | Yes                               | Mod high   | III |                                                                                                |
| Vanacore 2010        | Yes                                                         | Yes                                                 | Yes                       | Yes                               | Mod high   | III |                                                                                                |
| Felmus 1976          | Yes                                                         | No*                                                 | Yes                       | No                                | High       | IV  | *Controls from hospital/clinic, not from population at risk                                    |
| Scarmeas 2002        | Yes                                                         | No*                                                 | Yes                       | Yes                               | High       | IV  | *Enough that controls and ALS patients were from the same clinic? No age/sex/location matching |
| Veldink 2005         | Yes                                                         | No*                                                 | Yes                       | Yes                               | High       | IV  | *Patients asked to find their own controls friends and family                                  |

## Risk of bias criteria and class of evidence (CoE)

| CoE | Risk of bias                                                                                                                                                                            | Study design                                         | Criteria                                                                                                                                                                                                                                                                                                                     |
|-----|-----------------------------------------------------------------------------------------------------------------------------------------------------------------------------------------|------------------------------------------------------|------------------------------------------------------------------------------------------------------------------------------------------------------------------------------------------------------------------------------------------------------------------------------------------------------------------------------|
| I   | <b>Low risk</b><br>Study adheres to commonly held tenets of high quality design, execution and avoidance of bias                                                                        | Good quality cohort <sup>1</sup>                     | <ul style="list-style-type: none"> <li>• Prospective design</li> <li>• Patients at similar point in the course of their disease or treatment</li> <li>• F/U rate of 80%<sup>2</sup></li> <li>• Patients followed long enough for outcomes to occur</li> <li>• Accounting for other prognostic factors<sup>3</sup></li> </ul> |
| II  | <b>Moderately low risk</b><br>Study has potential for some bias; does not meet all criteria for level I but deficiencies not likely to invalidate results or introduce significant bias | Moderate quality cohort                              | <ul style="list-style-type: none"> <li>• Prospective design, with violation of one of the other criteria for good quality cohort study.</li> <li>• Retrospective design, meeting all the rest of the criteria in level I</li> </ul>                                                                                          |
| III | <b>Moderately high risk</b><br>Study has flaws in design and/or execution that increase potential for bias that may invalidate study results                                            | Poor quality cohort<br><br>Good quality case-control | <ul style="list-style-type: none"> <li>• Prospective design with violation of 2 or more criteria for good quality cohort, or</li> <li>• Retrospective design with violation of 1 or more criteria for good quality cohort</li> <li>• A good case-control study<sup>4</sup></li> </ul>                                        |
| IV  | <b>High risk</b><br>Study has significant potential for bias; does not include design features geared toward minimizing bias and/or does not have a comparison group                    | Poor quality case-control                            | Other than a good case-control study                                                                                                                                                                                                                                                                                         |

<sup>1</sup> Cohort studies follow individuals with the exposure of interest over time and monitor for occurrence of the outcome of interest.

<sup>2</sup> Applies to cohort studies.

<sup>3</sup> Authors should consider other factors that might influence patient outcomes and should control for them if appropriate.

<sup>4</sup> A good case-control study must have the all of the following: all incident cases from the defined population over a specified time period, controls that represent the population from which the cases come, exposure that precedes an outcome of interest, and accounting for other prognostic factors.
